# Supplementary material for: Horseradish Peroxidase-Encapsulated Fluorescent Bio-Nanoparticle for Ultra-Sensitive and Easy Detection of Hydrogen Peroxide
Source: MDPI journal article supplement (doi:10.3390/bios13020289), 2023-02-17
Supplement: s1 [file s1]

Supporting Information

# Horseradish Peroxidase-Encapsulated Fluorescent Bio-Nanoparticle for Ultra-Sensitive and Easy Detection of Hydrogen Peroxide

Myeong-Jun Lee<sup>1,†</sup>, Ji-Ae Song<sup>1,†</sup>, Jin-Ha Choi<sup>2</sup>, Jeong-Hyeop Shin<sup>1</sup>, Ji-Woon Myeong<sup>1</sup>, Ki-Ppeum Lee<sup>1</sup>, Taehwan Kim<sup>1</sup>, Ki-Eob Park<sup>3</sup> and Byung-Keun Oh<sup>1,\*</sup>

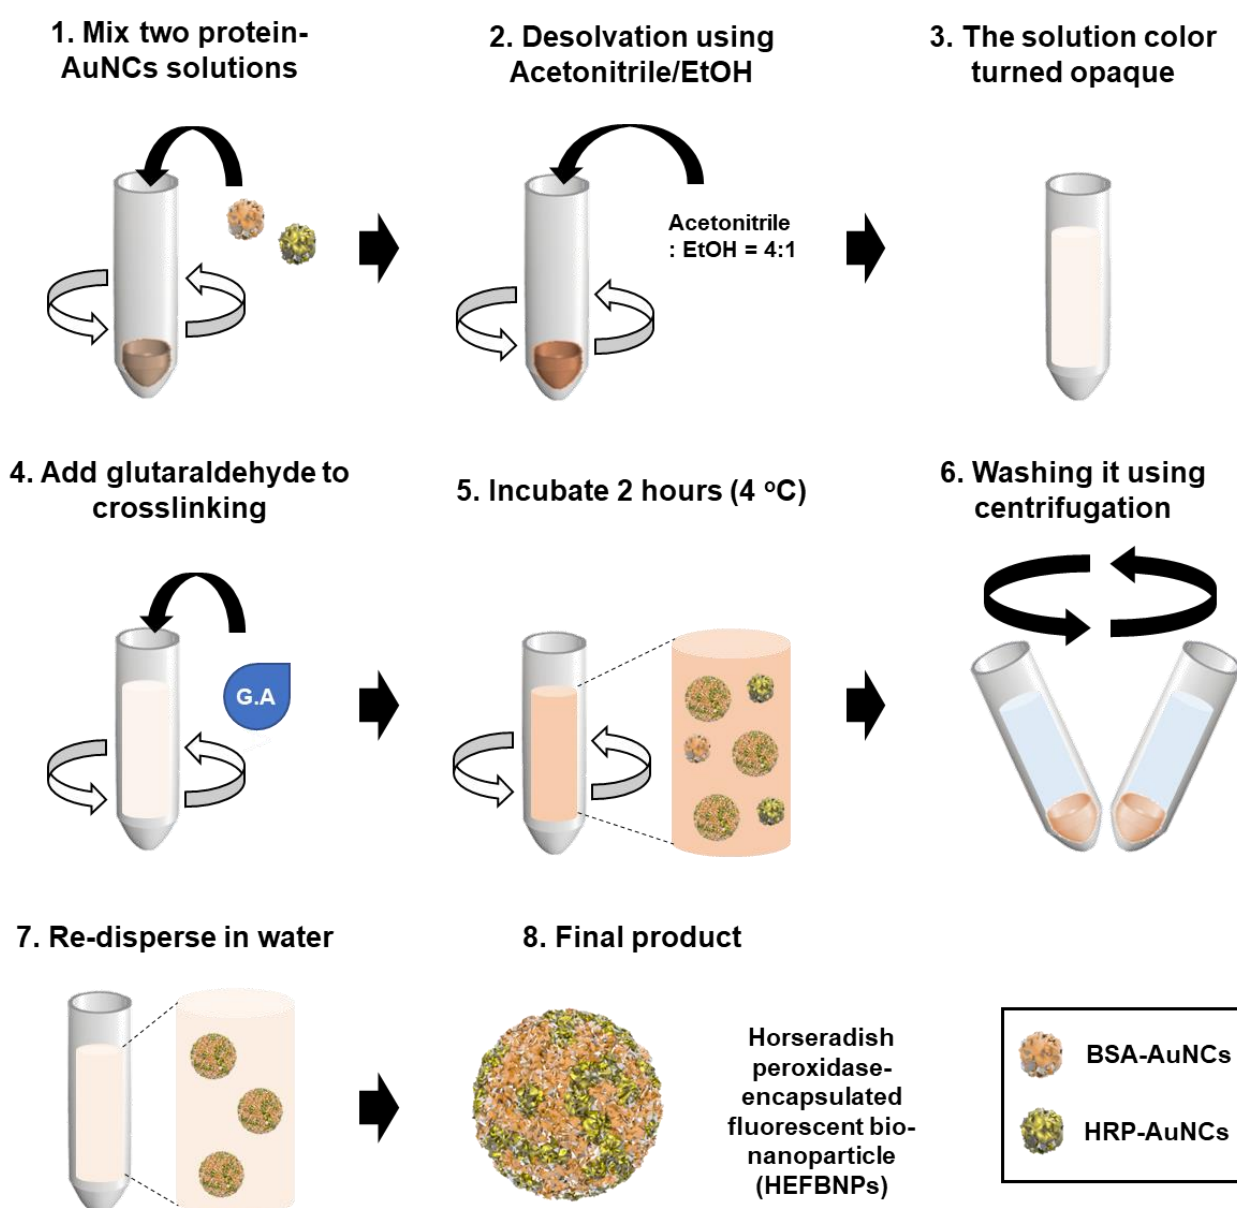

**Figure S1.** Synthesis procedure of HEFBNPs by desolvation and cross-linking methods.

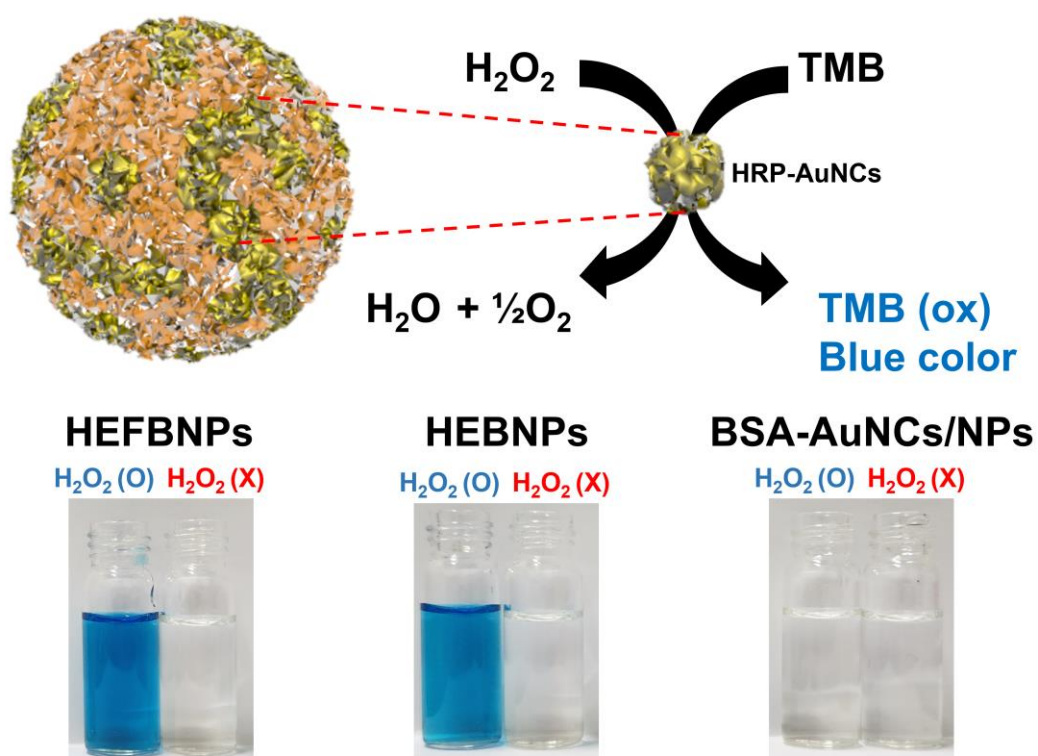

**Figure S2.** Encapsulated HRP-AuNC within HEFBNP via crosslinking process with HRP-AuNC and BSA-AuNC mixture.

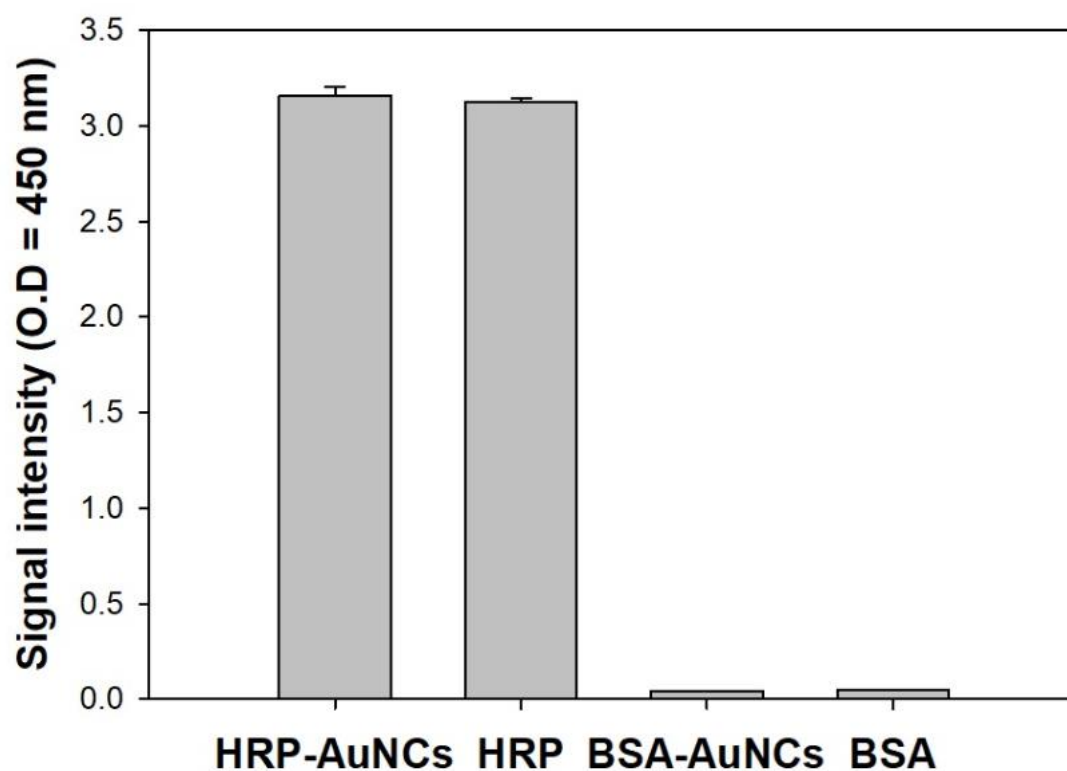

**Figure S3.** Comparison enzymatic reaction of materials in HEFBNPs (n=3).

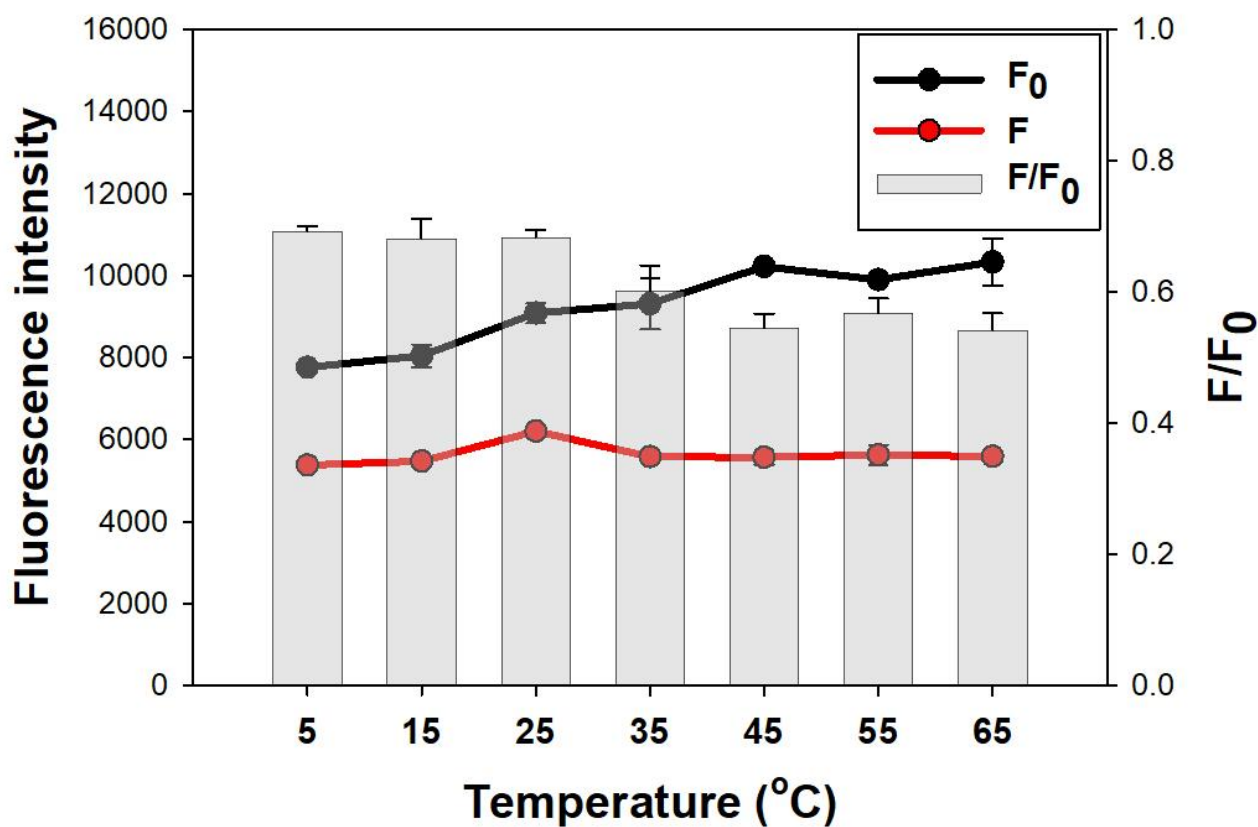

Figure S4. Influence of temperature on the detection of  $\text{H}_2\text{O}_2$  using HEFBNPs ( $n=3$ ).

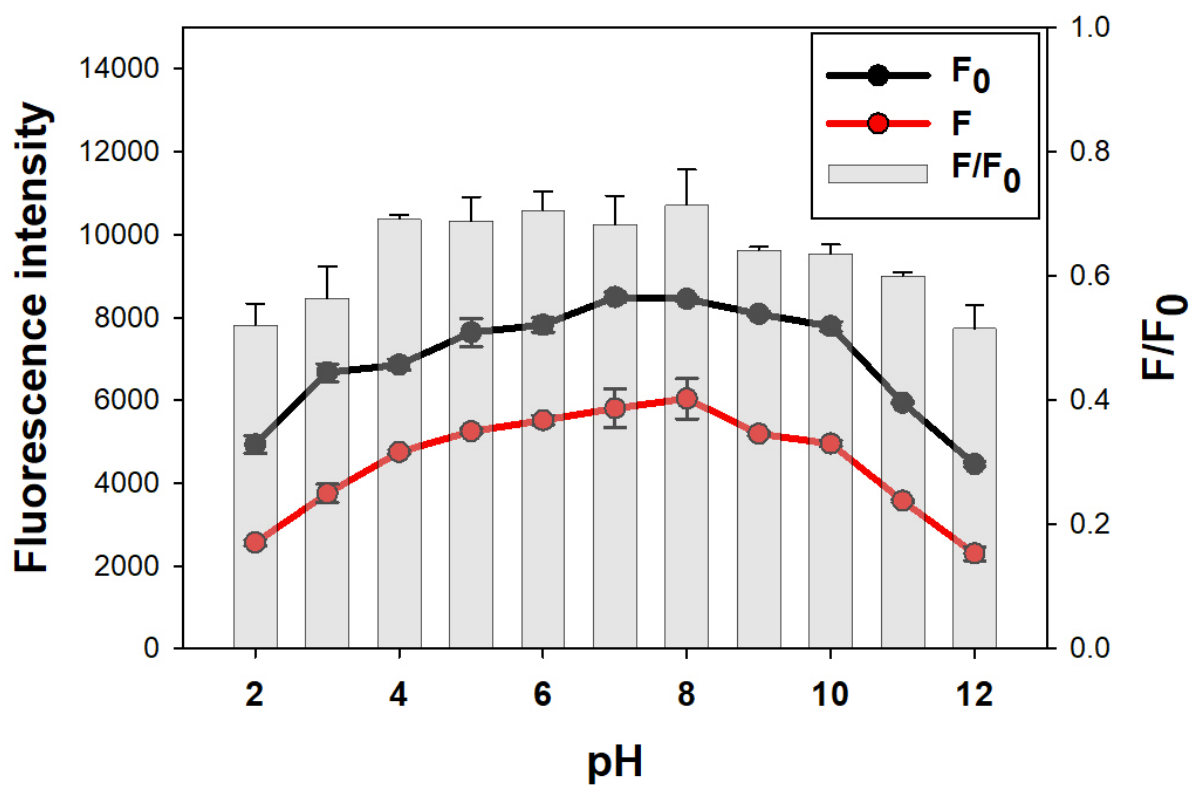

Figure S5. Influence of pH on the detection of  $\text{H}_2\text{O}_2$  using HEFBNPs ( $n=3$ ).

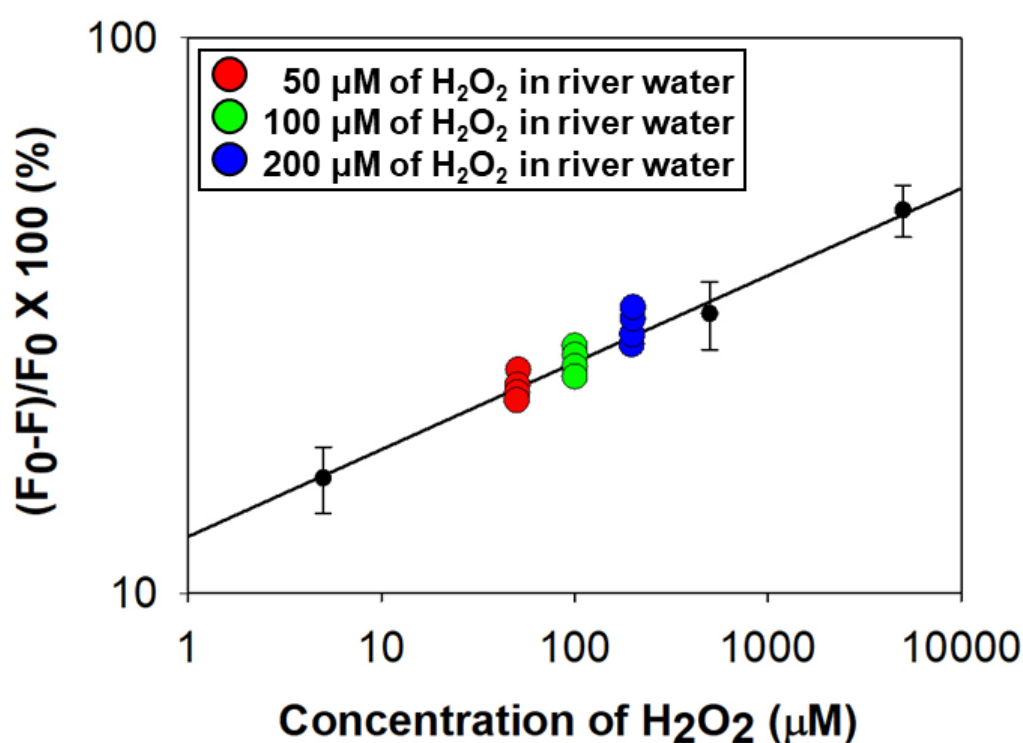

**Figure S6.** Comparison of results from HEFBNPs analysis using real river water with calibration curve that conducted by experimental condition ( $n=4$ ). When the real sample analyzed, the condition as follows; 20 °C, pH 7,  $F_0$  = Fluorescence intensity when HEFBNPs mixed with blank river water,  $F$  = Fluorescence intensity when HEFBNPs mixed with river water containing known concentration of  $\text{H}_2\text{O}_2$ . River water samples containing known concentrations of  $\text{H}_2\text{O}_2$  were artificially made with final concentration of  $\text{H}_2\text{O}_2$  = 50, 100, 200  $\mu\text{M}$  using blank river water. The fluorescence analyzing method of  $F$  and  $F_0$  were same as manuscript.
